# Supplementary material
Source: Research Square preprint supplement (doi:10.21203/rs.3.rs-9695373/v1)
Supplement: Supplementary file 1 [file 2feb19b183c35caf44bf294c.pdf]

# Nutritional Literacy and Its Association with Dietary Intake and Anthropometric Characteristics in Youth Academy Football Players

## ASSESSMENT

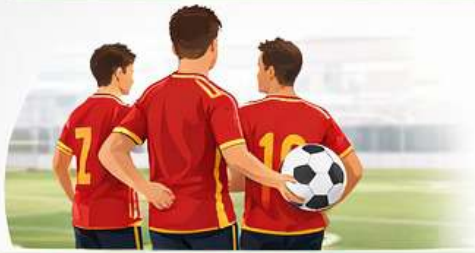

96 Youth Football Players  
Kayserispor Football Academy

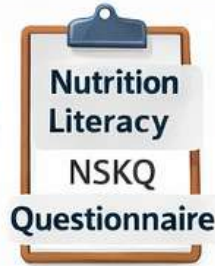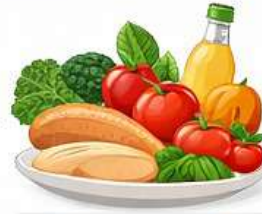

Dietary Intake  
(TÜBER)

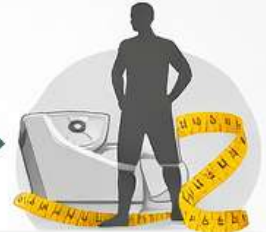

Anthropometric  
Measurements

## KEY FINDINGS

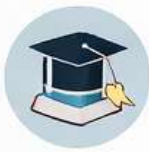

40.6% received  
nutrition education  
61.5% by a dietitian

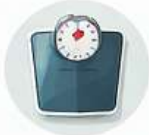

97.9% normal weight  
(WHO growth references)

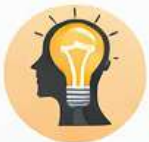

Median NSKQ Score:  
25.00  
96.87% poor nutrition  
knowledge

Inadequate Nutritional Status: **86.4%**

### Insufficient Intake (%)

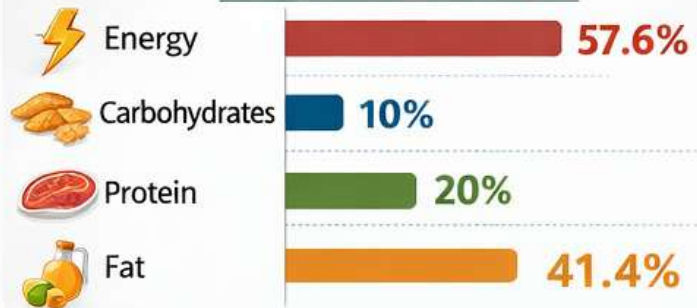

Higher NSKQ Score → Positive Association with

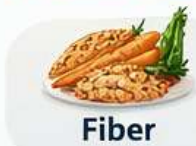

Fiber

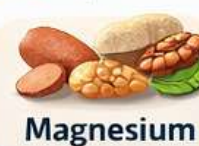

Magnesium

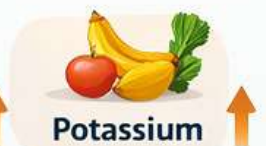

Potassium

## CONCLUSIONS & IMPLICATIONS

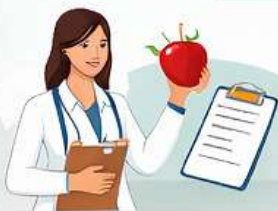

Need for Dietitian-Led  
Nutrition Education

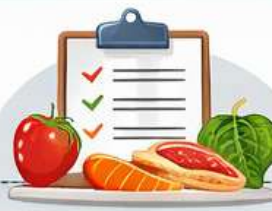

Improve Dietary  
Intake & Knowledge

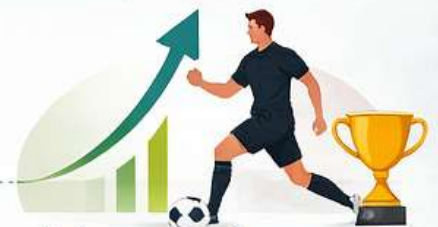

Enhance Performance  
& Health

Despite some nutrition education, youth football players showed **poor nutrition knowledge** and **inadequate energy & nutrient intake**.
